# Supplementary material for: Physiotherapy-assisted overground exoskeleton use: mixed methods feasibility study protocol quantifying the user experience, as well as functional, neural, and muscular outcomes in children with mobility impairments
Source: Frontiers journal article supplement (doi:10.3389/fnins.2024.1398459), 2024-07-31
Supplement: Data_Sheet_1.PDF [file Data_Sheet_1.PDF]

## *Supplementary Material*

**Supplementary Material 1.** Trexo Session Forms: “Trexo Session Tracking” forms will be completed by study researchers attending the Trexo physiotherapy intervention sessions. The “PT/PTA Summary Log Sheet” and “Session Activity Tracking Log” will be completed by treating PTs/PTAs. Each form is completed per session.

**Supplementary Material 2.** MRI Scan Parameters: structural, diffusion, and resting state functional scans.

|                                       | <b>3D T1</b> | <b>3D T2</b> | <b>dMRI</b>                                      | <b>fMRI</b> |
|---------------------------------------|--------------|--------------|--------------------------------------------------|-------------|
| <b>Sequence</b>                       | 3D MPRAGE    | SPACE        | Echo planar (b=1000,1600, 2600 mm <sup>2</sup> ) | EPI BOLD    |
| <b>Field of view (mm<sup>3</sup>)</b> | 256          | 256          | 244                                              | 222         |
| <b>Slice orientation</b>              | Sagittal     | Sagittal     | Transversal                                      | Transversal |
| <b>TE (ms)</b>                        | 1870         | 409          | 73                                               | 30          |
| <b>TR (ms)</b>                        | 3.1          | 3200         | 3800                                             | 1500        |
| <b>Flip Angle (°)</b>                 | 9            | -            | -                                                | 70          |
| <b>Voxel Size (mm isotropic)</b>      | 0.8          | 0.8          | 2                                                | 3           |
| <b>Slice Thickness (mm)</b>           | 0.8          | 0.8          | 2                                                | 3           |
| <b>Number of slices (contiguous)</b>  | 240          | 190          | 70                                               | 50          |
| <b>Directions</b>                     | -            | -            | 36, 46, 67                                       | -           |
| <b>Scan time</b>                      | 5 min 03 s   | 7 min 22 s   | 2 min 35 s, 3 min 13 s, 4 min 33 s               | 5 min 10 s  |

**Supplementary Material 3.** Trexo Physical Adjustment Template: to be completed during the Trexo fitting/acclimation session(s), pre-intervention. This will include measurements and first steps in the Trexo to ensure comfort of fit.

Child's Study ID: \_\_\_\_\_ Recorder's Initials: \_\_\_\_\_

***Trexo Session Tracking, Continued***

Date: MM-DD-YY: \_\_\_\_\_ Session #: \_\_\_\_\_

**Trexo Session Tracking**

Staff present/role in the session: 1. \_\_\_\_\_ 2. \_\_\_\_\_  
3. \_\_\_\_\_ 4. \_\_\_\_\_

Session start-time: \_\_\_\_\_ Start time once set-up completed: \_\_\_\_\_ End of walking in Trexo time: \_\_\_\_\_

Individual session: \_\_\_\_\_ OR Gym/group session: \_\_\_\_\_ Location of session: \_\_\_\_\_

1. Start time: 0:00 \*Pace (steps/min): \_\_\_\_\_ Pace or other setting changes while moving: \_\_\_\_\_  
\*Stop time: \_\_\_\_\_ \*Total Steps Taken: \_\_\_\_\_ Reason for stop: \_\_\_\_\_ Time paused (from stop watch): \_\_\_\_\_  
Physical activity done: \_\_\_\_\_ Adjustments made while stopped: \_\_\_\_\_

2. Start time: 0:00 \*Pace (steps/min): \_\_\_\_\_ Pace or other setting changes while moving: \_\_\_\_\_  
\*Stop time: \_\_\_\_\_ \*Total Steps Taken: \_\_\_\_\_ Reason for stop: \_\_\_\_\_ Time paused (from stop watch): \_\_\_\_\_  
Physical activity done: \_\_\_\_\_ Adjustments made while stopped: \_\_\_\_\_

3. Start time: 0:00 \*Pace (steps/min): \_\_\_\_\_ Pace or other setting changes while moving: \_\_\_\_\_  
\*Stop time: \_\_\_\_\_ \*Total Steps Taken: \_\_\_\_\_ Reason for stop: \_\_\_\_\_ Time paused (from stop watch): \_\_\_\_\_  
Physical activity done: \_\_\_\_\_ Adjustments made while stopped: \_\_\_\_\_

4. Start time: 0:00 \*Pace (steps/min): \_\_\_\_\_ Pace or other setting changes while moving: \_\_\_\_\_  
\*Stop time: \_\_\_\_\_ \*Total Steps Taken: \_\_\_\_\_ Reason for stop: \_\_\_\_\_ Time paused (from stop watch): \_\_\_\_\_  
Physical activity done: \_\_\_\_\_ Adjustments made while stopped: \_\_\_\_\_

5. Start time: 0:00 \*Pace (steps/min): \_\_\_\_\_ Pace or other setting changes while moving: \_\_\_\_\_  
\*Stop time: \_\_\_\_\_ \*Total Steps Taken: \_\_\_\_\_ Reason for stop: \_\_\_\_\_ Time paused (from stop watch): \_\_\_\_\_  
Physical activity done: \_\_\_\_\_ Adjustments made while stopped: \_\_\_\_\_

6. Start time: 0:00 \*Pace (steps/min): \_\_\_\_\_ Pace or other setting changes while moving: \_\_\_\_\_  
\*Stop time: \_\_\_\_\_ \*Total Steps Taken: \_\_\_\_\_ Reason for stop: \_\_\_\_\_ Time paused (from stop watch): \_\_\_\_\_  
Physical activity done: \_\_\_\_\_ Adjustments made while stopped: \_\_\_\_\_

7. Start time: 0:00 \*Pace (steps/min): \_\_\_\_\_ Pace or other setting changes while moving: \_\_\_\_\_  
\*Stop time: \_\_\_\_\_ \*Total Steps Taken: \_\_\_\_\_ Reason for stop: \_\_\_\_\_ Time paused (from stop watch): \_\_\_\_\_  
Physical activity done: \_\_\_\_\_ Adjustments made while stopped: \_\_\_\_\_

Child's Study ID: \_\_\_\_\_ Recorder's Initials: \_\_\_\_\_ *Trexo Session Tracking, Continued* Date: MM-DD-YY: \_\_\_\_\_ Session #: \_\_\_\_\_

\*Total number of steps taken in this session: \_\_\_\_\_ \*Total session walk time on tablet: \_\_\_\_\_

\*Cumulative # of steps for all sessions: \_\_\_\_\_ \*User initiation % Left leg: \_\_\_\_\_ % Right leg: \_\_\_\_\_

Number of pauses for adjustments/repositioning during session (NOT stops done to allow a standing activity): \_\_\_\_\_

\*Support level: \_\_\_\_\_ Any changes in support level during session? No \_\_\_\_\_ Yes \_\_\_\_\_

If yes, please indicate new level and when this occurred in the session and comments on rationale for change:

Pacing Notes throughout session: \_\_\_\_\_

Endurance mode or Strength mode: \_\_\_\_\_

\* Left side ROM settings at start of session: Hip max ext \_\_\_\_\_ Hip max flex \_\_\_\_\_ Knee max flex \_\_\_\_\_ Knee min flex \_\_\_\_\_

Any left side ROM changes during session? No \_\_\_\_\_ Yes \_\_\_\_\_ If yes, specify new ranges and rationale for change:

NEW RANGE: Hip max ext \_\_\_\_\_ Hip max flex \_\_\_\_\_ Knee max flex \_\_\_\_\_ Knee min flex \_\_\_\_\_ Changed @ Session time: \_\_\_\_\_

\* Right side ROM settings at start of session: Hip max ext \_\_\_\_\_ Hip max flex \_\_\_\_\_ Knee max flex \_\_\_\_\_ Knee min flex \_\_\_\_\_

Any right side ROM changes during session? No \_\_\_\_\_ Yes \_\_\_\_\_ If yes, specify new ranges and rationale for change:

NEW RANGE: Hip max ext \_\_\_\_\_ Hip max flex \_\_\_\_\_ Knee max ext \_\_\_\_\_ Knee min flex \_\_\_\_\_ Changed @ Session time: \_\_\_\_\_

Comments about session pauses, tasks, communication, Trexo training challenges, session highlights, social interactions, fatigue

Recorder's name and Signature: \_\_\_\_\_

Date: \_\_\_\_\_

Child's Study ID: \_\_\_\_\_

Treating PT's Initials: \_\_\_\_\_

Date: \_\_\_\_\_  
mm-dd-yyyy**Trexo PT Session Activity Log**

- Write each activity in that you did at this session. Then for each activity, place a '1' in the box that indicates the **focus of the activity** and a '2' in **ALL other boxes** that the activity relates to in your session.
- The **focus of an activity** can change from session to session.
- Activity details should include limb(s) (right/left) and joint(s) as appropriate. Also please note the location where activity took place

| # | Activity Details<br>(and location)<br>Individual _____<br>OR Gym Class _____ | Duration<br>(min) | Trexo<br>walking<br>distance<br>(endurance) | Trexo<br>walking speed<br>(fitness)       | Functional<br>use of Trexo       | Directional<br>control of<br>the Trexo | Quality of<br>Gait in<br>Trexo | Neck, Trunk<br>Control in<br>Trexo |
|---|------------------------------------------------------------------------------|-------------------|---------------------------------------------|-------------------------------------------|----------------------------------|----------------------------------------|--------------------------------|------------------------------------|
| 1 |                                                                              |                   |                                             |                                           |                                  |                                        |                                |                                    |
|   |                                                                              |                   | Focus on<br>upper limb<br>use in Trexo      | Focused dual<br>tasking while<br>in Trexo | Other<br>(specify in<br>the box) |                                        |                                |                                    |
|   |                                                                              |                   |                                             |                                           |                                  |                                        |                                |                                    |
|   |                                                                              |                   | Details:                                    |                                           |                                  |                                        |                                |                                    |
|   |                                                                              | Duration<br>(min) | Trexo<br>walking<br>distance<br>(endurance) | Trexo<br>walking speed<br>(fitness)       | Functional<br>use of Trexo       | Directional<br>control of<br>the Trexo | Quality of<br>Gait in<br>Trexo | Neck, Trunk<br>Control in<br>Trexo |
| 2 |                                                                              |                   |                                             |                                           |                                  |                                        |                                |                                    |
|   |                                                                              |                   | Focus on<br>upper limb<br>use in Trexo      | Focused dual<br>tasking while<br>in Trexo | Other<br>(specify in<br>the box) |                                        |                                |                                    |
|   |                                                                              |                   |                                             |                                           |                                  |                                        |                                |                                    |
|   |                                                                              |                   | Details:                                    |                                           |                                  |                                        |                                |                                    |

Child's Study ID: \_\_\_\_\_

Treating PT's Initials: \_\_\_\_\_

Date: \_\_\_\_\_  
mm-dd-yyyy

| # | Activity Details<br>(and location) | Duration<br>(min) | Trexo<br>walking<br>distance<br>(endurance) | Trexo<br>walking speed<br>(fitness)       | Functional<br>use of Trexo       | Directional<br>control of<br>the Trexo | Quality of<br>Gait in<br>Trexo | Neck, Trunk<br>Control in<br>Trexo |
|---|------------------------------------|-------------------|---------------------------------------------|-------------------------------------------|----------------------------------|----------------------------------------|--------------------------------|------------------------------------|
| 3 |                                    |                   |                                             |                                           |                                  |                                        |                                |                                    |
|   |                                    |                   | Focus on<br>upper limb<br>use in<br>Trexo   | Focused dual<br>tasking while<br>in Trexo | Other<br>(specify in the<br>box) |                                        |                                |                                    |
|   |                                    |                   |                                             |                                           |                                  |                                        |                                |                                    |
|   |                                    | Details:          |                                             |                                           |                                  |                                        |                                |                                    |
|   |                                    | Duration<br>(min) | Trexo<br>walking<br>distance<br>(endurance) | Trexo<br>walking speed<br>(fitness)       | Functional<br>use of Trexo       | Directional<br>control of<br>the Trexo | Quality of<br>Gait in<br>Trexo | Neck, Trunk<br>Control in<br>Trexo |
| 4 |                                    |                   |                                             |                                           |                                  |                                        |                                |                                    |
|   |                                    |                   | Focus on<br>upper limb<br>use in<br>Trexo   | Focused dual<br>tasking while<br>in Trexo | Other<br>(specify in the<br>box) |                                        |                                |                                    |
|   |                                    |                   |                                             |                                           |                                  |                                        |                                |                                    |
|   |                                    | Details:          |                                             |                                           |                                  |                                        |                                |                                    |

PT's/PTA's Signature: \_\_\_\_\_ Date: \_\_\_\_\_

Study Number: \_\_\_\_\_

Session Date: \_\_\_\_\_

## Trexo: PT/PTA Summary Log Sheet

To be completed after each session

1. Positive aspects of the session:
  
  
  
  
  
  
  
  
  
  
2. Challenges encountered in the session:
  
  
  
  
  
  
  
  
  
  
3. Specific pain/discomfort/other issues associated with the session:
  
  
  
  
  
  
  
  
  
  
4. Ideas for next session:
  
  
  
  
  
  
  
  
  
  
5. Any follow-up action from today's session:
  
  
  
  
  
  
  
  
  
  
6. Home program ideas/changes
  
  
  
  
  
  
  
  
  
  
7. Other interventions (therapy or medical)/special physical activity since last session:

PT Signature: \_\_\_\_\_

Date: \_\_\_\_\_

## TREXO PHYSICAL ADJUSTMENT TEMPLATE

*Note – settings may change over time.*

**Participant Profile:**  
(name on Trexo tablet)

**Baseline Range of Motion**

**Hip to Knee (cm):**

**Knee to Floor (cm):**

**Hip Width (cm):**

**Trexo Motor Width:**

**Foot Plate Size:**

**Shin Cuff Size:**

**Rifton Height:**

**Seat Height:**

**Considerations for Sessions:**

### LEFT LEG

|      |               |             |
|------|---------------|-------------|
| HIP  | Max Extension | Max Flexion |
|      |               |             |
| KNEE | Max Flexion   | Min Flexion |
|      |               |             |

### RIGHT LEG

|      |               |             |
|------|---------------|-------------|
| HIP  | Max Extension | Max Flexion |
|      |               |             |
| KNEE | Max Flexion   | Min Flexion |
|      |               |             |

**Trexo Support Force:**
